# Supplementary material
Source: ML conference proceedings conference paper supplement (https://proceedings.mlr.press/v38/solin15.html)
Supplement: Supplementary file 1 [file solin15-supp.pdf]

---

# Supplementary Material

---

This is the supplementary material for ‘*State space methods for efficient inference in Student- $t$  process regression*’ by Solin and Särkkä published in Proceedings of the 18<sup>th</sup> International Conference on Artificial Intelligence and Statistics (AISTATS). The references in this document point to the bibliography in the article.

## 1.1 Proof of Lemma 2.2

*Proof.* Let  $\gamma \sim \text{IG}(\alpha, \beta)$  be inverse gamma distributed with parameters  $\alpha$  and  $\beta$  and  $\mathbf{y} \mid \gamma \sim \text{N}(\boldsymbol{\mu}, \gamma \mathbf{K})$ . The scale mixture form of the probability density function can be written as

$$p(\mathbf{y}) = \int_0^\infty \frac{\beta^\alpha}{\Gamma(\alpha)} \gamma^{-\alpha-1} \exp\left(-\frac{\beta}{\gamma}\right) \frac{1}{(2\pi)^{\frac{n}{2}}} \frac{1}{|\gamma \mathbf{K}|^{\frac{1}{2}}} \exp\left(-\frac{1}{2} \frac{\Delta^2}{\gamma}\right) d\gamma \quad (12)$$

$$= \frac{1}{\Gamma(\alpha)} \frac{1}{(2\beta\pi)^{\frac{n}{2}}} \frac{1}{|\mathbf{K}|^{\frac{1}{2}}} \int_0^\infty \xi^{\alpha+\frac{n}{2}-1} \exp\left(-\xi\left(1+\frac{\Delta^2}{2\beta}\right)\right) d\xi \quad (13)$$

$$= \frac{\Gamma(\alpha + \frac{n}{2})}{\Gamma(\alpha)} \frac{1}{(2\beta\pi)^{\frac{n}{2}}} \frac{1}{|\mathbf{K}|^{\frac{1}{2}}} \left(1 + \frac{\Delta^2}{2\beta}\right)^{-(\alpha+\frac{n}{2})}, \quad (14)$$

where  $\Delta^2 = (\mathbf{y} - \boldsymbol{\mu})^\top \mathbf{K}^{-1} (\mathbf{y} - \boldsymbol{\mu})$ . We now recognize this as the Student- $t$  density in Definition 2.1 by parametrizing  $\alpha = \frac{\nu}{2}$  and  $\beta = \frac{\nu-2}{2}$ . Thus  $\mathbf{y} \sim \text{MVT}(\boldsymbol{\mu}, \mathbf{K}, \nu)$ . Note the redundancy in  $\gamma \sim \text{IG}(\frac{\nu}{2}, \rho \frac{\nu-2}{2})$  and  $\mathbf{y} \mid \gamma \sim \text{N}(\boldsymbol{\mu}, \frac{\gamma}{\rho} \mathbf{K})$  for  $\rho > 0$ . Without loss of generality, we choose  $\rho = 1$ .  $\square$

## 1.2 Marginal likelihood for the naive TP

We write down the negative log marginal likelihood (energy) function and its derivatives with respect to the degrees of freedom  $\nu$  and the covariance hyperparameters  $\boldsymbol{\theta} = (\sigma_n^2, \theta_1, \theta_2, \dots)$ . The negative log marginal likelihood,  $\mathcal{L} = -\log p(\mathbf{y} \mid \nu, \boldsymbol{\theta})$ , is given by

$$\mathcal{L} = \frac{n}{2} \log((\nu - 2)\pi) + \frac{1}{2} \log(|\mathbf{K}_{\boldsymbol{\theta}}|) - \log\left(\Gamma\left(\frac{\nu+n}{2}\right)\right) + \log\left(\Gamma\left(\frac{\nu}{2}\right)\right) + \frac{\nu+n}{2} \log\left(1 + \frac{\beta}{\nu-2}\right), \quad (15)$$

where  $\beta = \mathbf{y}^\top \mathbf{K}_{\boldsymbol{\theta}}^{-1} \mathbf{y}$ . The derivatives can now be given as

$$\frac{\partial}{\partial \nu} \mathcal{L} = \frac{1}{2} \frac{n}{\nu-2} - \frac{1}{2} \psi\left(\frac{\nu+n}{2}\right) + \frac{1}{2} \psi\left(\frac{\nu}{2}\right) + \frac{1}{2} \log\left(1 + \frac{\beta}{\nu-2}\right) - \frac{1}{2} \frac{(\nu+n)\beta}{(\nu-2)(\nu-2+\beta)}, \quad (16)$$

$$\frac{\partial}{\partial \theta_i} \mathcal{L} = \frac{1}{2} \text{Tr}\left(\mathbf{K}_{\boldsymbol{\theta}}^{-1} \frac{\partial \mathbf{K}_{\boldsymbol{\theta}}}{\partial \theta_i}\right) + \frac{1}{2} \frac{\nu+n}{\nu-2+\beta} \mathbf{y}^\top \mathbf{K}_{\boldsymbol{\theta}}^{-1} \frac{\partial \mathbf{K}_{\boldsymbol{\theta}}}{\partial \theta_i} \mathbf{K}_{\boldsymbol{\theta}}^{-1} \mathbf{y}, \quad (17)$$

where  $\psi(\cdot)$  is the digamma function.

### 1.3 Marginal likelihood for the state space TP

The negative log marginal likelihood can be evaluated recursively starting from  $\mathcal{L}_0 = 0$ :

$$\begin{aligned} \mathcal{L}_k = \mathcal{L}_{k-1} &+ \frac{1}{2} \log((\nu - 2)\pi) + \frac{1}{2} \log(|\mathbf{S}_k|) + \log \Gamma\left(\frac{\nu_{k-1}}{2}\right) \\ &- \log \Gamma\left(\frac{\nu_k}{2}\right) + \frac{1}{2} \log\left(\frac{\nu_{k-1} - 2}{\nu - 2}\right) + \frac{\nu_k}{2} \log\left(1 + \frac{\mathbf{v}_k^\top \mathbf{S}_k^{-1} \mathbf{v}_k}{\nu_{k-1} - 2}\right), \end{aligned} \quad (18)$$

where  $\mathbf{v}_k$  and  $\mathbf{S}_k$  are the innovation mean and covariance evaluated by the filter update step, and  $\nu_k = \nu_{k-1} + n_k$ . Formally differentiating  $\mathcal{L}_k$  gives a recursion algorithm for evaluating the gradient along with the filtering steps:

$$\begin{aligned} \frac{\partial \mathcal{L}_k(\boldsymbol{\theta})}{\partial \theta_i} &= \frac{\partial \mathcal{L}_{k-1}(\boldsymbol{\theta})}{\partial \theta_i} + \frac{1}{2} \text{Tr}\left(\mathbf{S}_k^{-1}(\boldsymbol{\theta}) \frac{\partial \mathbf{S}_k(\boldsymbol{\theta})}{\partial \theta_i}\right) \\ &+ \frac{\nu_k}{\nu_{k-1} - 2 + \mathbf{v}_k^\top \mathbf{S}_k^{-1} \mathbf{v}_k} \left( \mathbf{v}_k^\top(\boldsymbol{\theta}) \mathbf{S}_k^{-1}(\boldsymbol{\theta}) \frac{\partial \mathbf{v}_k(\boldsymbol{\theta})}{\partial \theta_i} - \frac{1}{2} \mathbf{v}_k^\top(\boldsymbol{\theta}) \mathbf{S}_k^{-1}(\boldsymbol{\theta}) \frac{\partial \mathbf{S}_k(\boldsymbol{\theta})}{\partial \theta_i} \mathbf{S}_k^{-1}(\boldsymbol{\theta}) \mathbf{v}_k(\boldsymbol{\theta}) \right). \end{aligned} \quad (19)$$

The formal differentiation of the function also includes differentiating the filter prediction and update steps. This leads to the following rather lengthy recursion formulas, which include a lot of small matrix operations. On the filter prediction step we compute:

$$\frac{\partial \mathbf{m}_{k|k-1}(\boldsymbol{\theta})}{\partial \theta_i} = \frac{\partial \mathbf{A}_{k-1}(\boldsymbol{\theta})}{\partial \theta_i} \mathbf{m}_{k-1|k-1}(\boldsymbol{\theta}) + \mathbf{A}_{k-1}(\boldsymbol{\theta}) \frac{\partial \mathbf{m}_{k-1|k-1}(\boldsymbol{\theta})}{\partial \theta_i}, \quad (20)$$

$$\begin{aligned} \frac{\partial \mathbf{P}_{k|k-1}(\boldsymbol{\theta})}{\partial \theta_i} &= \frac{\partial \mathbf{A}_{k-1}(\boldsymbol{\theta})}{\partial \theta_i} \mathbf{P}_{k-1|k-1}(\boldsymbol{\theta}) \mathbf{A}_{k-1}^\top(\boldsymbol{\theta}) + \mathbf{A}_{k-1}(\boldsymbol{\theta}) \frac{\partial \mathbf{P}_{k-1|k-1}(\boldsymbol{\theta})}{\partial \theta_i} \mathbf{A}_{k-1}^\top(\boldsymbol{\theta}) \\ &+ \mathbf{A}_{k-1}(\boldsymbol{\theta}) \mathbf{P}_{k-1|k-1}(\boldsymbol{\theta}) \frac{\partial \mathbf{A}_{k-1}^\top(\boldsymbol{\theta})}{\partial \theta_i} + \gamma_{k-1}(\boldsymbol{\theta}) \frac{\partial \mathbf{Q}_{k-1}(\boldsymbol{\theta})}{\partial \theta_i} + \frac{\partial \gamma_{k-1}(\boldsymbol{\theta})}{\partial \theta_i} \mathbf{Q}_{k-1}(\boldsymbol{\theta}), \end{aligned} \quad (21)$$

and on the filter update step we compute:

$$\frac{\partial \mathbf{v}_k(\boldsymbol{\theta})}{\partial \theta_i} = -\mathbf{H} \frac{\partial \mathbf{m}_{k|k-1}(\boldsymbol{\theta})}{\partial \theta_i}, \quad (22)$$

$$\frac{\partial \mathbf{S}_k(\boldsymbol{\theta})}{\partial \theta_i} = \mathbf{H} \frac{\partial \mathbf{P}_{k|k-1}(\boldsymbol{\theta})}{\partial \theta_i} \mathbf{H}^\top, \quad (23)$$

$$\frac{\partial \mathbf{K}_k(\boldsymbol{\theta})}{\partial \theta_i} = \frac{\partial \mathbf{P}_{k|k-1}(\boldsymbol{\theta})}{\partial \theta_i} \mathbf{H}^\top \mathbf{S}_k^{-1}(\boldsymbol{\theta}) - \mathbf{P}_{k|k-1}(\boldsymbol{\theta}) \mathbf{H}^\top \mathbf{S}_k^{-1}(\boldsymbol{\theta}) \frac{\partial \mathbf{S}_k(\boldsymbol{\theta})}{\partial \theta_i} \mathbf{S}_k^{-1}(\boldsymbol{\theta}), \quad (24)$$

$$\frac{\partial \mathbf{m}_{k|k}(\boldsymbol{\theta})}{\partial \theta_i} = \frac{\partial \mathbf{m}_{k|k-1}(\boldsymbol{\theta})}{\partial \theta_i} + \frac{\partial \mathbf{K}_k(\boldsymbol{\theta})}{\partial \theta_i} \mathbf{v}_k(\boldsymbol{\theta}) + \mathbf{K}_k(\boldsymbol{\theta}) \frac{\partial \mathbf{v}_k(\boldsymbol{\theta})}{\partial \theta_i}, \quad (25)$$

$$\begin{aligned} \frac{\partial \mathbf{P}_{k|k}(\boldsymbol{\theta})}{\partial \theta_i} &= \frac{\gamma_k(\boldsymbol{\theta})}{\gamma_{k-1}(\boldsymbol{\theta})} \left( \frac{\partial \mathbf{P}_{k|k-1}(\boldsymbol{\theta})}{\partial \theta_i} - \frac{\partial \mathbf{K}_k(\boldsymbol{\theta})}{\partial \theta_i} \mathbf{S}_k(\boldsymbol{\theta}) \mathbf{K}_k^\top(\boldsymbol{\theta}) \right. \\ &- \mathbf{K}_k(\boldsymbol{\theta}) \frac{\partial \mathbf{S}_k(\boldsymbol{\theta})}{\partial \theta_i} \mathbf{K}_k^\top(\boldsymbol{\theta}) - \mathbf{K}_k(\boldsymbol{\theta}) \mathbf{S}_k(\boldsymbol{\theta}) \frac{\partial \mathbf{K}_k^\top(\boldsymbol{\theta})}{\partial \theta_i} \left. \right) \\ &+ \frac{1}{\gamma_{k-1}(\boldsymbol{\theta})} \left( \frac{\partial \gamma_k(\boldsymbol{\theta})}{\partial \theta_i} - \frac{\gamma_k(\boldsymbol{\theta})}{\gamma_{k-1}(\boldsymbol{\theta})} \frac{\partial \gamma_{k-1}(\boldsymbol{\theta})}{\partial \theta_i} \right) \left( \mathbf{P}_{k|k-1} - \mathbf{K}_k \mathbf{S}_k \mathbf{K}_k^\top \right), \end{aligned} \quad (26)$$

$$\begin{aligned} \frac{\partial \gamma_k(\boldsymbol{\theta})}{\partial \theta_i} &= \frac{\partial \gamma_{k-1}(\boldsymbol{\theta})}{\partial \theta_i} \frac{\nu_{k-1} - 2 + \mathbf{v}_k^\top \mathbf{S}_k^{-1} \mathbf{v}_k}{\nu_k - 2} \\ &+ \frac{\gamma_{k-1}(\boldsymbol{\theta})}{\nu_k - 2} \left( 2 \mathbf{v}_k^\top(\boldsymbol{\theta}) \mathbf{S}_k^{-1}(\boldsymbol{\theta}) \frac{\partial \mathbf{v}_k(\boldsymbol{\theta})}{\partial \theta_i} - \mathbf{v}_k^\top(\boldsymbol{\theta}) \mathbf{S}_k^{-1}(\boldsymbol{\theta}) \frac{\partial \mathbf{S}_k(\boldsymbol{\theta})}{\partial \theta_i} \mathbf{S}_k^{-1}(\boldsymbol{\theta}) \mathbf{v}_k(\boldsymbol{\theta}) \right). \end{aligned} \quad (27)$$

Note that, the derivative  $\frac{\partial \mathcal{L}}{\partial \nu}$  can be evaluated as given in Equation (16), if the  $\beta = \beta_n$  is evaluated along the filtering recursion such that  $\beta_k = \beta_{k-1} + \gamma_{k-1} \mathbf{v}_k^\top \mathbf{S}_k^{-1} \mathbf{v}_k$  and starting from  $\beta_0 = 0$ . For maximum *a posteriori* estimation, the recursion should be started from the initial condition  $\frac{\partial \mathcal{L}_0(\boldsymbol{\theta})}{\partial \theta_i} = -\frac{\partial \log p(\boldsymbol{\theta})}{\partial \theta_i}$ . For a similar formulation for the Gaussian filter, see [6] and the references therein.
